# Supplementary material for: Validation of the Korean version of the walking impairment questionnaire in patients with peripheral arterial disease
Source: PubMed Central journal article supplement — Ann Surg Treat Res. 2017 Jul 28;93(2):103–9. doi: 10.4174/astr.2017.93.2.103 (PMC5566744; doi:10.4174/astr.2017.93.2.103), 2017-07-28
Supplement: astr-93-103-s001.pdf [file astr-93-103-s001.pdf]

**Supplementary Material 1.** Scoring of the Korean version of the walking impairment questionnaire (WIQ)

| 지난 한주간 다음의 이유로 보행에 어려움을 겪을 정도 | 전혀 어렵지 않음 | 약간 어려움 | 다소 어려움 | 많이 어려움 | 대단히 어려움 |
|-------------------------------|-----------|--------|--------|--------|---------|
| 종아리의 통증, 쑤심, 또는 경련            | 4         | 3      | 2      | 1      | 0       |
| 둔부의 통증, 쑤심, 또는 경련             | 4         | 3      | 2      | 1      | 0       |

| 지난 한주간 다음의 행위에 겪은 어려움 (distance score) | 전혀 어렵지 않음 | 약간 어려움 | 다소 어려움 | 많이 어려움 | 할 수 없음 | Weight |
|----------------------------------------|-----------|--------|--------|--------|--------|--------|
| 집안 돌아다니기 등 실내보행                        | 4         | 3      | 2      | 1      | 0      | 20     |
| 50보 보행                                 | 4         | 3      | 2      | 1      | 0      | 50     |
| 150보 보행 (1/2블록)                        | 4         | 3      | 2      | 1      | 0      | 150    |
| 300보 보행 (1블록)                          | 4         | 3      | 2      | 1      | 0      | 300    |
| 600보 보행 (2블록)                          | 4         | 3      | 2      | 1      | 0      | 600    |
| 900보 보행 (3블록)                          | 4         | 3      | 2      | 1      | 0      | 900    |
| 1500보 보행 (5블록)                         | 4         | 3      | 2      | 1      | 0      | 1500   |

| 지난 한주간 다음의 행위에 겪은 어려움 (speed score) | 전혀 어렵지 않음 | 약간 어려움 | 다소 어려움 | 많이 어려움 | 할 수 없음 | Weight |
|-------------------------------------|-----------|--------|--------|--------|--------|--------|
| 1블록을 천천히 보행                         | 4         | 3      | 2      | 1      | 0      | 1.5    |
| 1블록을 평균 속도로 보행                      | 4         | 3      | 2      | 1      | 0      | 2      |
| 1블록을 빠르게 보행                         | 4         | 3      | 2      | 1      | 0      | 3      |
| 1블록을 뛰거나 조깅                         | 4         | 3      | 2      | 1      | 0      | 5      |

| 지난 한주간 다음의 행위에 겪은 어려움 (stair score) | 전혀 어렵지 않음 | 약간 어려움 | 다소 어려움 | 많이 어려움 | 할 수 없음 | Weight |
|-------------------------------------|-----------|--------|--------|--------|--------|--------|
| 계단 1줄 오르기                           | 4         | 3      | 2      | 1      | 0      | 1      |
| 계단 2줄 오르기                           | 4         | 3      | 2      | 1      | 0      | 2      |
| 계단 3줄 오르기                           | 4         | 3      | 2      | 1      | 0      | 3      |

$$WIQ\ score = \frac{distance\ score + speed\ score + stair\ score}{3}$$

Ex.) stair score =  $\frac{4 \times 1(wt.) + 2 \times 2 + 1 \times 3}{4 \times 1 + 4 \times 2 + 4 \times 3} = 0.458$
